# Supplementary material for: Survival Analysis in Endometrial Carcinomas by Type of Surgical Approach: A Matched-Pair Study
Source: MDPI journal article supplement (doi:10.3390/cancers14041081), 2022-02-21
Supplement: s1 [file s1]

# Supplementary Material: Survival Analysis in Endometrial Carcinomas by Type of Surgical Approach: A Matched-Pair Study

Pluvio J. Coronado, Agnieszka Rychlik, Laura Baquedano, Virginia García-Pineda, Maria A. Martínez-Maestre, Denis Querleu, Ignacio Zapardiel

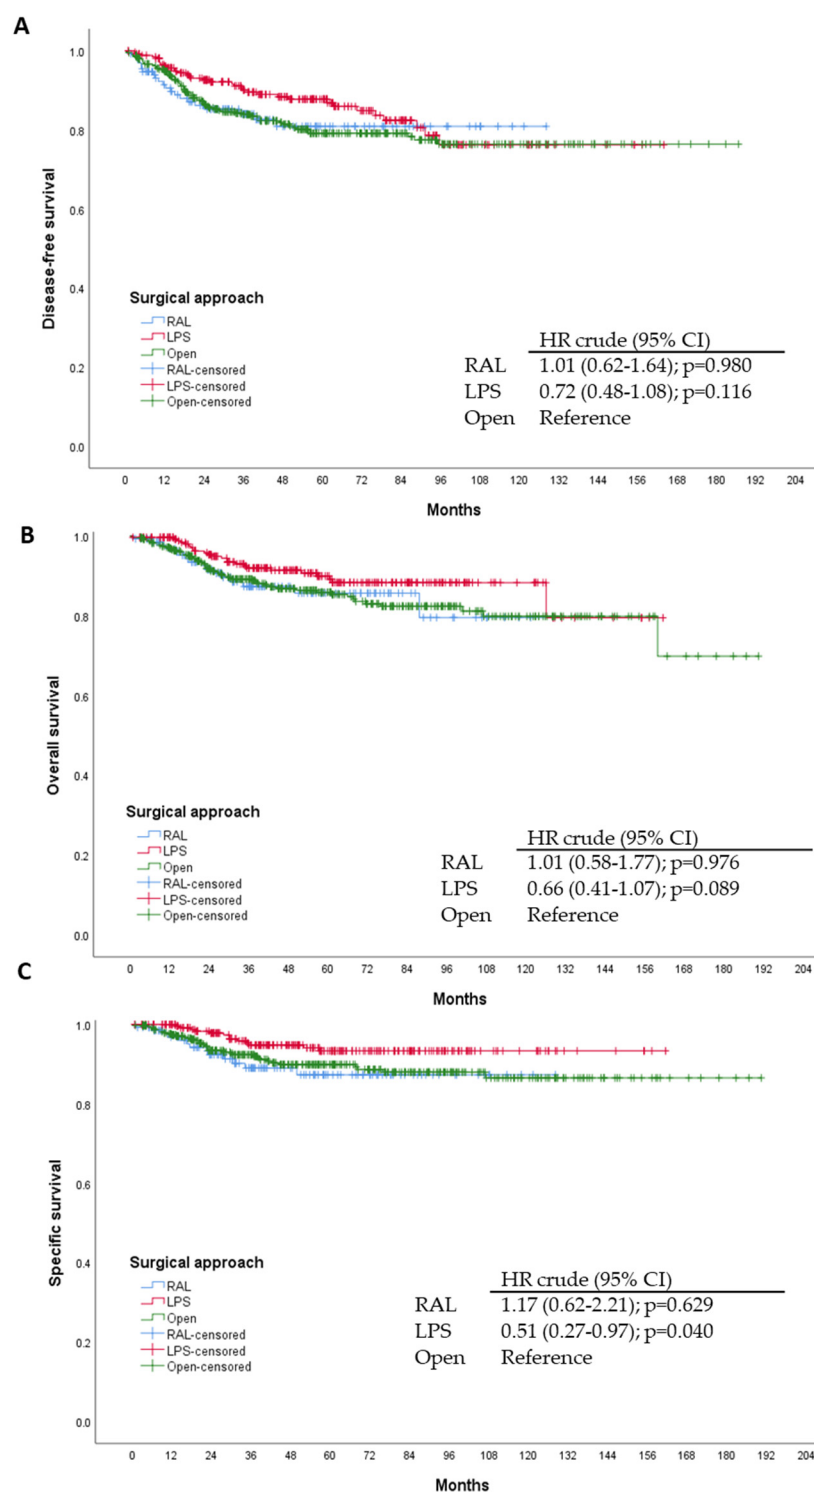

**Figure S1.** Kaplan–Meier curves for the matched surgical groups. The hazard ratio, 95% confidence interval, and corresponding p value were estimated with the use of Cox proportional-hazards models. MIS: Minimally invasive surgery, indicates laparoscopic (LPS) or robot-assisted approach (RAL). Open: open surgery or laparotomic approach. A: disease-free survival curve. B: overall survival curve. C: specific survival curve.

**Table S1.** Cox’s Multivariant analysis to identify the independent prognostic variables associated to disease free survival and overall survival.

| Disease Free Survival |                                    |        |       |        |      |        |                 |                 |
|-----------------------|------------------------------------|--------|-------|--------|------|--------|-----------------|-----------------|
|                       | B                                  | SE     | Wald  | df     | Sig. | Exp(B) | CI 95% Inferior | Exp(B) Superior |
| Step 1                | Age (years)                        | 0.028  | 0.007 | 15.013 | 1    | 0.000  | 1.028           | 1.042           |
|                       | BMI >30 kg/m <sup>2</sup>          | −0.072 | 0.138 | .274   | 1    | 0.601  | 0.930           | 1.220           |
|                       | ASA >III                           | 0.262  | 0.102 | 6.581  | 1    | 0.010  | 1.299           | 1.587           |
|                       | Associated diseases <sup>1</sup>   | −0.354 | 0.144 | 6.028  | 1    | 0.014  | 0.702           | 0.931           |
|                       | Histological subtype (endometriod) | −0.408 | 0.181 | 5.071  | 1    | 0.024  | 0.665           | 0.948           |
|                       | Histological grade 3               | 0.802  | 0.180 | 19.812 | 1    | 0.000  | 2.230           | 3.174           |
|                       | Deep myometrial invasion           | 0.461  | 0.139 | 10.936 | 1    | 0.001  | 1.586           | 2.084           |
| Step 2                | Advanced FIGO stage                | 1.080  | 0.160 | 45.571 | 1    | 0.000  | 2.944           | 4.029           |
|                       | Age (years)                        | 0.028  | 0.007 | 14.966 | 1    | 0.000  | 1.028           | 1.042           |
|                       | ASA >III                           | 0.256  | 0.102 | 6.332  | 1    | 0.012  | 1.291           | 1.576           |
|                       | Associated diseases <sup>1</sup>   | −0.370 | 0.141 | 6.839  | 1    | 0.009  | 0.691           | 0.912           |
|                       | Histological subtype (endometriod) | −0.419 | 0.180 | 5.404  | 1    | 0.020  | 0.658           | 0.936           |
|                       | Histological grade 3               | 0.805  | 0.180 | 20.068 | 1    | 0.000  | 2.236           | 3.180           |
|                       | Deep myometrial invasion           | 0.464  | 0.139 | 11.108 | 1    | 0.001  | 1.590           | 2.089           |
|                       | Advanced FIGO stage                | 1.078  | 0.160 | 45.474 | 1    | 0.000  | 2.939           | 4.021           |
| Overall Survival      |                                    |        |       |        |      |        |                 |                 |
|                       | B                                  | SE     | Wald  | df     | Sig. | Exp(B) | CI 95% Inferior | Exp(B) Superior |
| Step 1                | Age (years)                        | 0.045  | 0.008 | 33.955 | 1    | 0.000  | 1.046           | 1.062           |
|                       | BMI >30 kg/m <sup>2</sup>          | 0.023  | 0.142 | 0.027  | 1    | 0.870  | 1.023           | 1.351           |
|                       | ASA >III                           | 0.609  | 0.101 | 36.403 | 1    | 0.000  | 1.839           | 2.242           |
|                       | Associated diseases <sup>1</sup>   | −0.317 | 0.158 | 4.019  | 1    | 0.045  | 0.728           | 0.993           |
|                       | Histological subtype (endometriod) | −0.430 | 0.186 | 5.327  | 1    | 0.021  | 0.651           | 0.937           |
|                       | Histological grade 3               | 1.071  | 0.188 | 32.398 | 1    | 0.000  | 2.919           | 4.222           |
|                       | Deep myometrial invasion           | 0.659  | 0.155 | 18.135 | 1    | 0.000  | 1.933           | 2.618           |
| Step 2                | Advanced FIGO stage                | 0.846  | 0.170 | 24.651 | 1    | 0.000  | 2.330           | 3.254           |
|                       | Age (years)                        | 0.045  | 0.008 | 33.948 | 1    | 0.000  | 1.046           | 1.062           |
|                       | ASA >III                           | 0.611  | 0.101 | 36.941 | 1    | 0.000  | 1.842           | 2.243           |
|                       | Associated diseases <sup>1</sup>   | −0.312 | 0.155 | 4.046  | 1    | 0.044  | 0.732           | 0.992           |
|                       | Histological subtype (endometriod) | −0.427 | 0.185 | 5.305  | 1    | 0.021  | 0.653           | 0.938           |
|                       | Histological grade 3               | 1.071  | 0.188 | 32.343 | 1    | 0.000  | 2.918           | 4.221           |
|                       | Deep myometrial invasion           | 0.658  | 0.155 | 18.098 | 1    | 0.000  | 1.931           | 2.614           |
|                       | Advanced FIGO stage                | 0.846  | 0.170 | 24.652 | 1    | 0.000  | 2.330           | 3.254           |

BMI: Body Mass index. ASA: American Society of Anesthesiology. <sup>1</sup>Includes tobacco smoking, diabetes, cardiovascular diseases, thromboembolic disease, chronic pneumopathies and liver diseases.

**Table S2.** Patient demographics and pathology results in MIS matched-pair analysis (*n* = 399).

|                                             | Robotic N= 134 | LPS N= 265  | p Value |
|---------------------------------------------|----------------|-------------|---------|
| Age (years)                                 | 66.5 ± 10.0    | 66.5 ± 10.7 | 0.971   |
| BMI (kg/m <sup>2</sup> )                    | 30.1 ± 5.8     | 29.8 ± 5.9  | 0.688   |
| Associated diseases <sup>1</sup>            | 87 (64.9)      | 183 (69.1)  | 0.405   |
| American Society of Anesthesiologists (ASA) |                |             | 0.057   |

|                        |             |             |       |
|------------------------|-------------|-------------|-------|
| I–II                   | 91 (67.9)   | 177 (66.8)  |       |
| III–IV                 | 40 (29.9)   | 62 (23.4)   |       |
| Unknown                | 3 (2.2)     | 26 (9.8)    |       |
| Years from menopause   | 2.9 ± 0.5   | 2.9 ± 0.5   | 0.946 |
| Parity                 | 1.7 ± 0.1   | 1.5 ± 0.1   | 0.078 |
| Histologic subtype     |             |             | 0.248 |
| Endometrioid           | 112 (83.6)  | 233 (87.9)  |       |
| Serous Papillary       | 14 (10.4)   | 17 (6.4)    |       |
| Clear cells            | 3 (2.2)     | 9 (3.4)     |       |
| Carcinosarcoma         | 5 (3.7)     | 4 (1.5)     |       |
| Undifferentiated       | 0 (0)       | 2 (0)       |       |
| Histological grade     |             |             | 0.028 |
| G1–G2                  | 90 (67.2)   | 205 (77.4)  |       |
| G3                     | 44 (32.8)   | 60 (22.6)   |       |
| Myometrial invasion    |             |             | 0.070 |
| < 50                   | 72 (53.7)   | 117 (44.2)  |       |
| ≥ 50                   | 62 (46.3)   | 148 (55.8)  |       |
| LVSI ( <i>n</i> = 765) |             |             | 0.205 |
| No                     | 114 (85.1)  | 206 (77.8)  |       |
| Yes                    | 20 (14.9)   | 52 (20.2)   |       |
| Stage at diagnosis     |             |             | 0.825 |
| Early (I–II)           | 122 (91.0)  | 243 (91.7)  |       |
| Advanced (III–IV)      | 12 (9.0)    | 22 (8.3)    |       |
| FIGO stage             |             |             | 0.465 |
| I                      | 103 (76.9)  | 221 (83.4)  |       |
| II                     | 9 (6.7)     | 13 (4.9)    |       |
| III                    | 19 (14.2)   | 26 (9.8)    |       |
| IV                     | 3 (2.2)     | 5 (1.9)     |       |
| Lymphadenectomy        |             |             | 0.036 |
| No                     | 40 (29.9)   | 78 (29.4)   |       |
| Pelvic only            | 66 (49.3)   | 103 (38.9)  |       |
| Pelvic and paraaortic  | 27 (20.1)   | 84 (31.7)   |       |
| Paraaortic only        | 1 (0.7)     | 0 (0)       |       |
| ESGO risk group        |             |             | 0.001 |
| Low                    | 47 (35.1)   | 65 (24.5)   |       |
| Intermediate           | 26 (19.4)   | 89 (33.6)   |       |
| Intermediate-high      | 8 (6.0)     | 38 (14.3)   |       |
| High                   | 50 (37.3)   | 68 (25.7)   |       |
| Advanced/Metastatic    | 3 (2.2)     | 5 (1.9)     |       |
| Adjuvant therapies     |             |             | 0.011 |
| No                     | 51 (38.1)   | 91 (34.3)   |       |
| Radiotherapy           | 56 (41.8)   | 148 (55.8)  |       |
| Chemotherapy           | 4 (3.0)     | 3 (1.1)     |       |
| Radio-chemotherapy     | 23 (17.2)   | 23 (8.7)    |       |
| Follow-up in alive     | 48.7 ± 30.1 | 58.9 ± 34.6 | 0.003 |

Data are given as mean ± standard deviation and frequencies (percentages). BMI: Body Mass index. LVSI: lymphovascular space invasion. LPS: laparoscopic approach. 1 Includes: tobacco smoking, diabetes, cardiovascular diseases, thromboembolic disease, chronic pneumopathies and liver diseases.
